# Supplementary material
Source: PubMed Central journal article supplement (PMC2962526)
Supplement: supp_M110.156281_sup03.pdf [file supp_M110.156281_sup03.pdf]

**Supplementary Table 1.** List of PK genes.

| Strain                                                            | GenBank ID | Group | Length (a.a.) | Identity (%) <sup>a</sup> | Activity against X5P                          | Activity against F6P                         | Reference |
|-------------------------------------------------------------------|------------|-------|---------------|---------------------------|-----------------------------------------------|----------------------------------------------|-----------|
| <i>Bifidobacterium breve</i> 203                                  | GU936109   | XFPK  | 825           | –                         | Specific activity<br>29.0 (U/mg)              | Specific activity<br>14.5 (U/mg)             | This work |
| <i>Bifidobacterium lactis</i>                                     | CAC29121   | XFPK  | 825           | 94                        | $V_{\max}/K_m$ <sup>b</sup><br>0.52 (U/mg/mM) | $V_{\max}/K_m$ <sup>b</sup><br>0.6 (U/mg/mM) | (1)       |
| <i>Bifidobacterium animalis</i> <sup>c</sup>                      | BAF37975   | XFPK  | 825           | 95                        | –                                             | –                                            | (2)       |
| <i>Bifidobacterium longum</i> <sup>c</sup>                        | AAN24771   | XFPK  | 825           | 84                        | –                                             | –                                            | (3)       |
| <i>Bifidobacterium longum</i> subsp. <i>infantis</i> <sup>c</sup> | ACJ52798   | XFPK  | 825           | 83                        | –                                             | –                                            | (4)       |
| <i>Lactobacillus pentosus</i>                                     | CAC84393   | XPK   | 788           | 46                        | Specific activity<br>4.5 (U/mg)               | –                                            | (5)       |
| <i>Lactobacillus paraplantarum</i>                                | AAQ64626   | XPK   | 788           | 46                        | –                                             | $V_{\max}/K_m$<br>98.3 (U/mg/mM)             | (6)       |
| <i>Lactobacillus plantarum</i>                                    | CAD65631   | XPK   | 803           | 47                        | $V_{\max}/K_m$<br>1.14 (IU/mg/mM)             | $V_{\max}/K_m$<br>0.075 (IU/mg/mM)           | (7)       |
| <i>Leuconostoc mesenteroides</i>                                  | AAV66077   | XPK   | 813           | 42                        | –                                             | Specific activity<br>0.3 (U/mg)              | (8)       |

<sup>a</sup>Amino acid sequence identity with *Bifidobacterium breve* XFPK (*Bb*XFPK). The amino acid sequence identities between the XPK and XFPK groups are about 45%, but the identities within each group are more than 80%.

<sup>b</sup>Measured using native enzyme.

<sup>c</sup>Putative genes annotated by genome projects

**Supplementary Table 2.** The forward oligonucleotide primers used for construction of *Bb*XFPK mutants.

| Name  | Sequence of oligonucleotide primer                 |
|-------|----------------------------------------------------|
| H64A  | 5'- ACCGTCTGGTCGGC <u>GCCT</u> GGGGCACCA -3'       |
| H64N  | 5'- ACCGTCTGGTCGGC <u>AACT</u> GGGGCACCA -3'       |
| H97A  | 5'- ATGGGCCCCGGGC <u>GCCG</u> GGCGGCCCGGCT -3'     |
| H97N  | 5'- ATGGGCCCCGGGC <u>AACG</u> GGCGGCCCGGCT -3'     |
| H142A | 5'- GCGGCATCCCGTCG <u>GCC</u> TTCGCCCCGGAGA -3'    |
| H142N | 5'- GCGGCATCCCGTCG <u>AACT</u> TTCGCCCCGGAGA -3'   |
| H320A | 5'- CTCCTGGCGTGCG <u>GCC</u> CAGGTCCCGCTGGCTT -3'  |
| H320N | 5'- CTCCTGGCGTGCG <u>AACC</u> CAGGTCCCGCTGGCTT -3' |
| Q321A | 5'- CTCCTGGCGTGCGC <u>ACGCC</u> GTCCCGCTGGCTT -3'  |
| S440A | 5'- ACCGGACGAGACCGCTG <u>CCA</u> AACCGCCTGAACG -3' |
| E479A | 5'- ACCGAGCAGCTCTCC <u>GCCC</u> ACCAGTGCGAGG -3'   |
| Y501F | 5'- ATCTGGAGCTCCT <u>TTCG</u> AGTCCTTCGTCCA -3'    |
| H548A | 5'- GTGGCGTCAGGATG <u>CCA</u> AACGGCTTCTCGCA -3'   |
| N549A | 5'- GCGGTCAGGATCAC <u>GCCG</u> GCTTCTCGCACCA -3'   |
| H553A | 5'- AACGGCTTCTCG <u>GCCC</u> CAGGACCCGGG -3'       |
| H553N | 5'- AACGGCTTCTCG <u>AACC</u> CAGGACCCGGG -3'       |
| K605A | 5'- ATCTTCGCCGGC <u>GCCC</u> CAGCCTGCTCCGA -3'     |

The mutated sequences are underlined

**Supplementary Table 3.** Data collection and refinement statistics of *Bb*XFPK mutants.

| Data set                                       | H64A             | H142A            | H320A            | H553A            |
|------------------------------------------------|------------------|------------------|------------------|------------------|
| <b>Data collection statistics</b>              |                  |                  |                  |                  |
| Space group                                    | <i>I422</i>      |                  |                  |                  |
| Unit cell (Å)                                  | <i>a</i> = 175.0 | <i>a</i> = 174.6 | <i>a</i> = 174.4 | <i>a</i> = 175.1 |
|                                                | <i>b</i> = 175.0 | <i>b</i> = 174.6 | <i>b</i> = 174.4 | <i>b</i> = 175.1 |
|                                                | <i>c</i> = 163.6 | <i>c</i> = 163.6 | <i>c</i> = 163.8 | <i>c</i> = 164.0 |
| Beam line                                      | PF-BL5A-         | PF-BL5A          | PF-BL5A          | PF-BL17A         |
| Wavelength (Å)                                 | 1.00000          | 1.00000          | 1.00000          | 1.00000          |
| Resolution (Å) <sup>a</sup>                    | 50-1.90          | 50-2.10          | 50-2.10          | 50-2.10          |
|                                                | (1.93-1.90)      | (2.14-2.10)      | (2.14-2.10)      | (2.14-2.10)      |
| Total reflections                              | 1,370,980        | 1,079,028        | 1,074,515        | 1,078,552        |
| Unique reflections                             | 99,057           | 73,408           | 73,346           | 74,103           |
| Completeness (%) <sup>a</sup>                  | 99.3 (100)       | 100 (100)        | 100 (100)        | 99.8 (99.9)      |
| <i>R</i> <sub>merge</sub> (%) <sup>a</sup>     | 5.8 (31.1)       | 7.2 (28.4)       | 7.1 (30.5)       | 7.7 (33.2)       |
| <i>I</i> /σ <sup>a</sup>                       | 57.6 (8.8)       | 44.7 (9.7)       | 47.5 (10.1)      | 42.1 (6.9)       |
| Redundancy <sup>a</sup>                        | 13.9 (12.8)      | 14.7 (14.9)      | 14.7 (14.7)      | 14.6 (13.2)      |
| <b>Refinement statistics</b>                   |                  |                  |                  |                  |
| Resolution range (Å)                           | 33.50-1.90       | 34.15-2.10       | 34.21-2.10       | 38.61-2.10       |
| No. of reflections                             | 92,268           | 69,663           | 69,576           | 70,211           |
| <i>R</i> -factor/ <i>R</i> <sub>free</sub> (%) | 16.3/20.6        | 15.8/19.6        | 15.0/19.4        | 15.8/19.1        |
| r.m.s.d. from ideal                            |                  |                  |                  |                  |
| Bond lengths (Å)                               | 0.031            | 0.029            | 0.028            | 0.029            |
| Bond angles (°)                                | 2.221            | 2.139            | 2.031            | 1.962            |
| Average <i>B</i> -factor (Å <sup>2</sup> )     |                  |                  |                  |                  |
| Protein                                        | 26.1             | 22.8             | 24.2             | 29.1             |
| Water                                          | 37.0             | 29.0             | 32.2             | 34.9             |
| ThDP                                           | 22.0             | 19.6             | 19.1             | 26.1             |
| Mg <sup>2+</sup>                               | 20.4             | 16.6             | 16.1             | 23.1             |
| Ramachandran plot (%)                          |                  |                  |                  |                  |
| Favoured                                       | 96.4             | 95.8             | 95.9             | 96.4             |
| Allowed                                        | 3.6              | 4.1              | 4.1              | 3.6              |
| Disallowed                                     | 0.0              | 0.1              | 0.0              | 0.0              |

<sup>a</sup>Values for highest resolution shell are given in parentheses.

## Supplementary Figure Legends

Supplementary Fig. 1. Amino acid sequence alignment of PK. The sequence alignment was generated using ESPript (10). Residues important for catalysis and substrate binding characterized in this work are indicated by arrows.

Supplementary Fig. 2. Phylogenetic tree of PK. The tree was constructed from the alignment shown in Supplementary Fig. 1 by the neighbor-joining method.

Supplementary Fig. 3. Stereoview of ThDP-binding manner in the active site of *Bb*XFPK. (A) Hydrophobic and hydrophilic interactions involved in the maintenance of V-conformation of ThDP. (B) The hexacoordinate geometry of  $Mg^{2+}$  ion and the interactions between diphosphate portion of ThDP and *Bb*XFPK.

Supplementary Fig. 4.  $|F_o|-|F_c|$  omit electron density maps of the cofactors and their covalent adducts in the active site of *Bb*XFPK mutants. (A) Map of AcThDP (H142A) contoured at  $3.5 \sigma$ . (B) Map of AcThDP (H320A) contoured at  $3.5 \sigma$ . (C) Map of ThDP (H553A) contoured at  $3.7 \sigma$ .

Supplementary Fig. 5. Stereoview of superimposition of the active site of wild-type (gray) and H64A mutant (colored) of *Bb*XFPK. Residues of H64A from PP domain of one subunit and Pyr domain of the other subunit are colored blue and yellow, respectively.

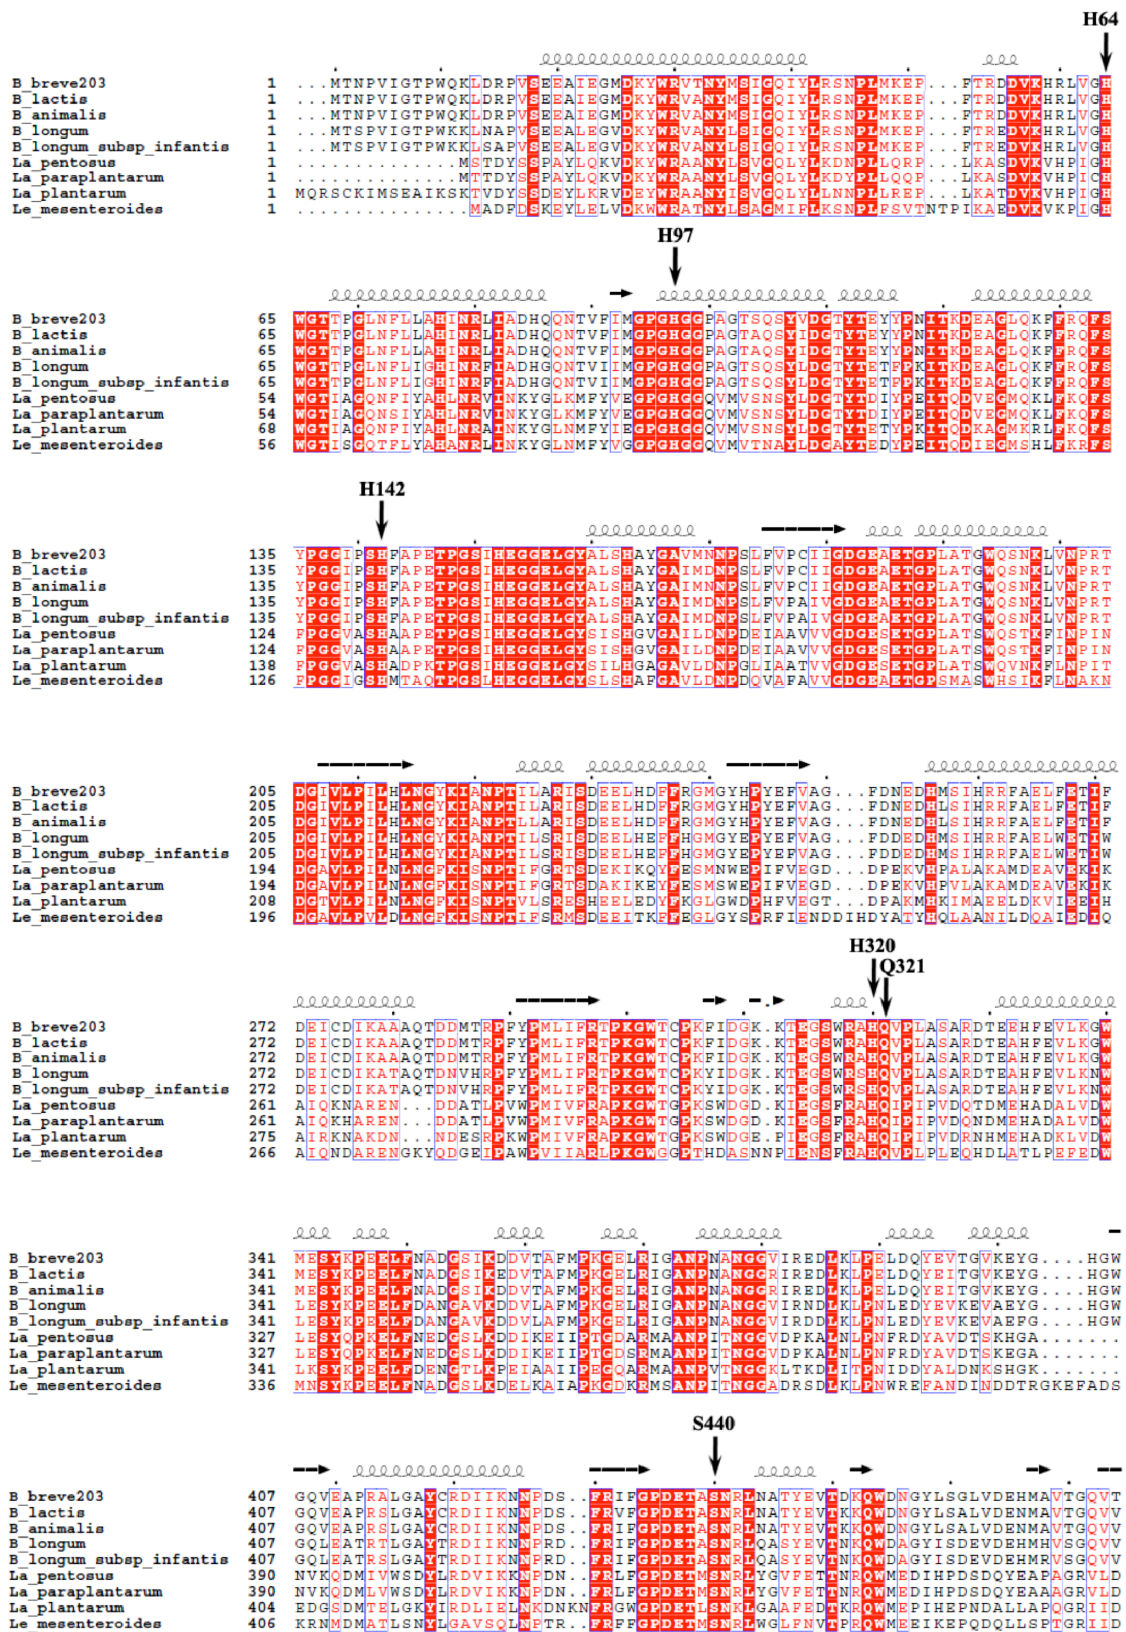

Suzuki et al., Supplementary Fig. 1



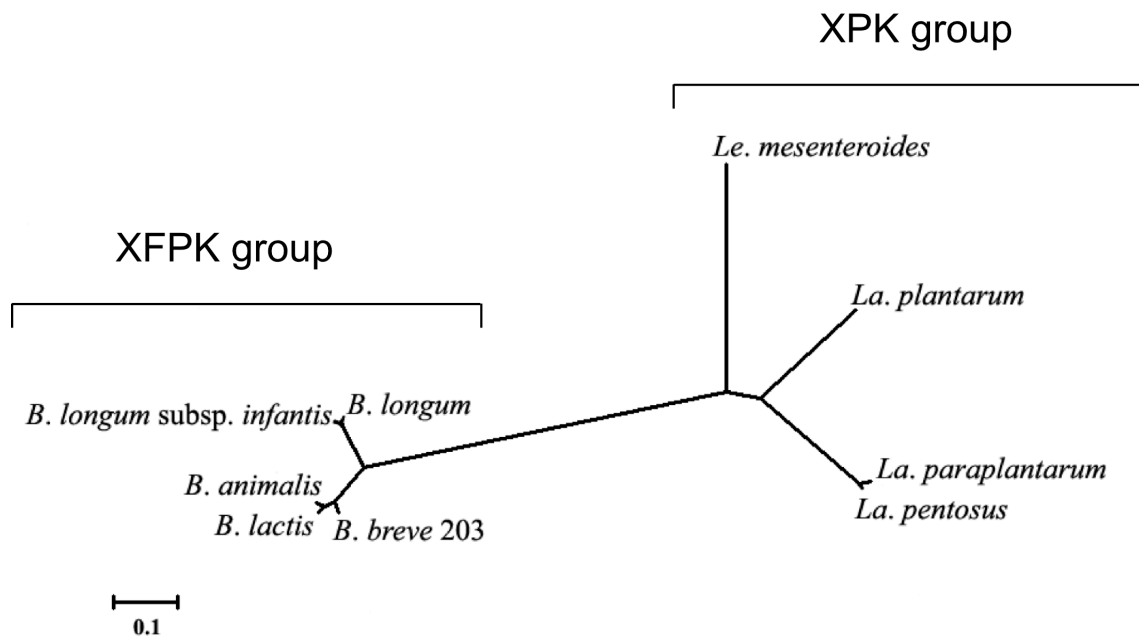

Suzuki et al., Supplementary Fig. 2

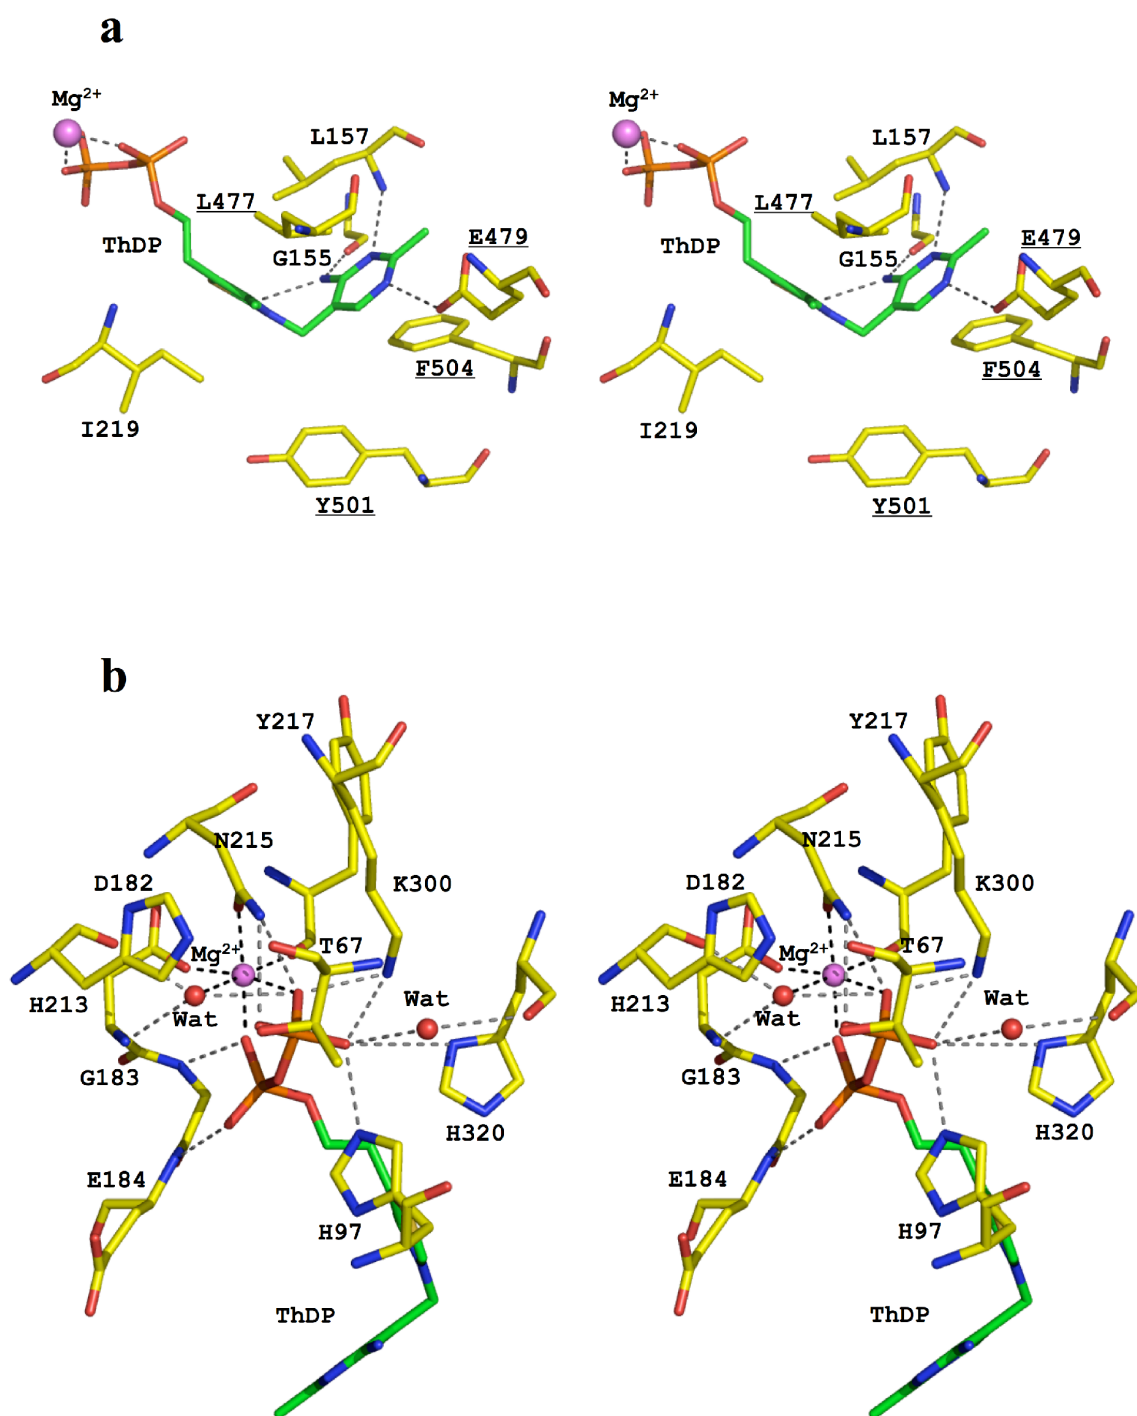

Suzuki et al., Supplementary Fig. 3



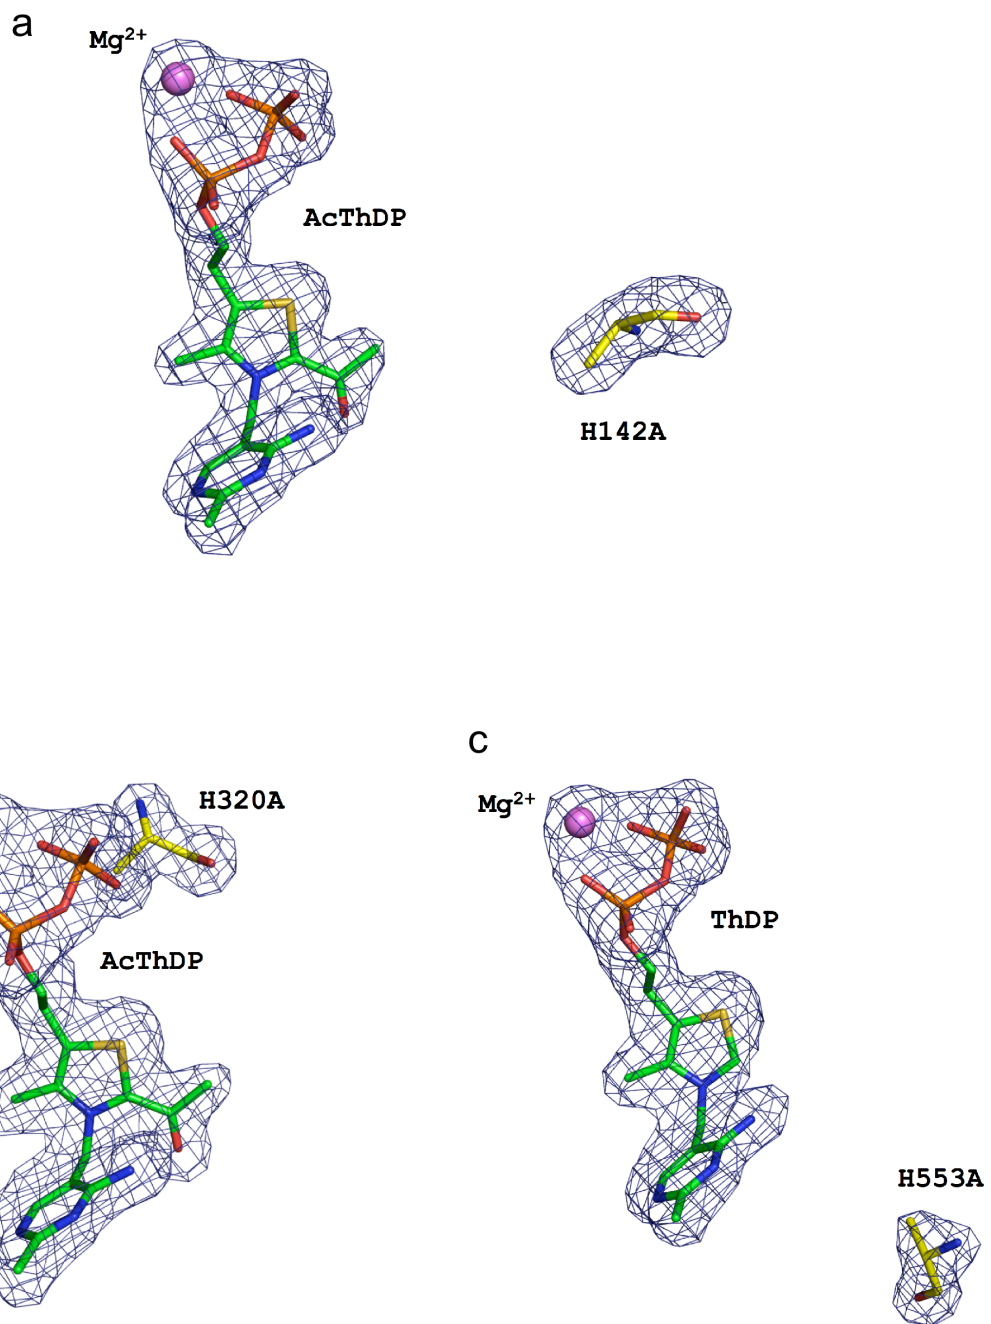

Suzuki et al., Supplementary Fig. 4

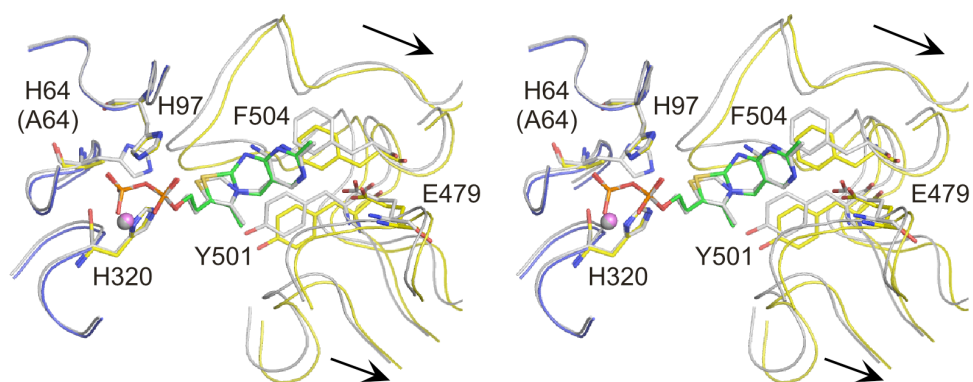

Suzuki et al.,  
Supplementary Fig. 5

## Supplementary references

1. Meile, L., Rohr, L. M., Geissmann, T. A., Herensperger, M., and Teuber, M. (2001) *J. Bacteriol.* **183**(9), 2929-2936
2. Chinen, A., Kozlov, Y. I., Hara, Y., Izui, H., and Yasueda, H. (2007) *J Biosci Bioeng* **103**(3), 262-269
3. Schell, M. A., Karmirantzou, M., Snel, B., Vilanova, D., Berger, B., Pessi, G., Zwahlen, M. C., Desiere, F., Bork, P., Delley, M., Pridmore, R. D., and Arigoni, F. (2002) *Proc Natl Acad Sci USA* **99**(22), 14422-14427
4. Sela, D. A., Chapman, J., Adeyua, A., Kim, J. H., Chen, F., Whitehead, T. R., Lapidus, A., Rokhsar, D. S., Lebrilla, C. B., German, J. B., Price, N. P., Richardson, P. M., and Mills, D. A. (2008) *Proc Natl Acad Sci USA* **105**(48), 18964-18969
5. Posthuma, C. C., Bader, R., Engelmann, R., Postma, P. W., Hengstenberg, W., and Pouwels, P. H. (2002) *Appl Environ Microbiol* **68**(2), 831-837
6. Jeong, D. W., Lee, J. M., and Lee, H. J. (2007) *J Microbiol Biotechnol* **17**(5), 822-829
7. Yevenes, A., and Frey, P. A. (2008) *Bioorg Chem* **36**(3), 121-127
8. Lee, J. M., Jeong, D. W., Koo, O. K., Kim, M. J., Lee, J. H., Chang, H. C., Kim, J. H., and Lee, H. J. (2005) *Biotechnol Lett* **27**(12), 853-858
9. Lovell, S. C., Davis, I. W., Arendall, W. B., 3rd, de Bakker, P. I., Word, J. M., Prisant, M. G., Richardson, J. S., and Richardson, D. C. (2003) *Proteins* **50**(3), 437-450
10. Gouet, P., Courcelle, E., Stuart, D. I., and Metoz, F. (1999) *Bioinformatics* **15**(4), 305-308
